# Supplementary material
Source: PubMed Central journal article supplement (PMC3570749)
Supplement: NIHMS433862-supplement-1_si_001.pdf [file NIHMS433862-supplement-1_si_001.pdf]

# Enhancing Biocompatibility of *D*-Oligopeptide Hydrogels by Negative Charges

Laura L. Hyland,<sup>1</sup> Julianne D. Twomey,<sup>1</sup> Savannah Vogel<sup>1</sup>, Adam H. Hsieh<sup>1,2</sup> and Y. Bruce Yu<sup>1,3\*</sup>

Fischell Department of Bioengineering, University of Maryland, College Park, MD 20742

Department of Orthopaedics, University of Maryland, Baltimore, MD, 21201 and Department of Pharmaceutical Sciences, School of Pharmacy, University of Maryland, Baltimore, MD 21201.

<sup>1</sup> Fischell Department of Bioengineering, University of Maryland, College Park, MD, USA.

<sup>2</sup> Department of Orthopaedics, University of Maryland, Baltimore, MD, USA

<sup>3</sup> Department of Pharmaceutical Sciences, University of Maryland, Baltimore, MD, USA.

## Table of Contents

|                                                                |     |
|----------------------------------------------------------------|-----|
| <b>Figure S1.</b> <i>L</i> <sup>+</sup> Analytical HPLC        | s2  |
| <b>Figure S2.</b> <i>L</i> <sup>-</sup> Analytical HPLC        | s3  |
| <b>Figure S3.</b> <i>D</i> <sup>+</sup> Analytical HPLC        | s4  |
| <b>Figure S4.</b> <i>D</i> <sup>-</sup> Analytical HPLC        | s5  |
| <b>Figure S5.</b> <i>L</i> <sup>+</sup> ESI(+)-MS              | s6  |
| <b>Figure S6.</b> <i>L</i> <sup>-</sup> ESI(-)-MS              | s7  |
| <b>Figure S7.</b> <i>D</i> <sup>+</sup> ESI(+)-MS              | s8  |
| <b>Figure S8.</b> <i>D</i> <sup>-</sup> ESI(-)-MS              | s9  |
| <b>Table S1A.</b> Paired t-test results for cell attachment    | s10 |
| <b>Table S1B.</b> Paired t-test results for cell proliferation | s11 |
| WST-1 subtraction procedure                                    | s14 |

## Supporting Information

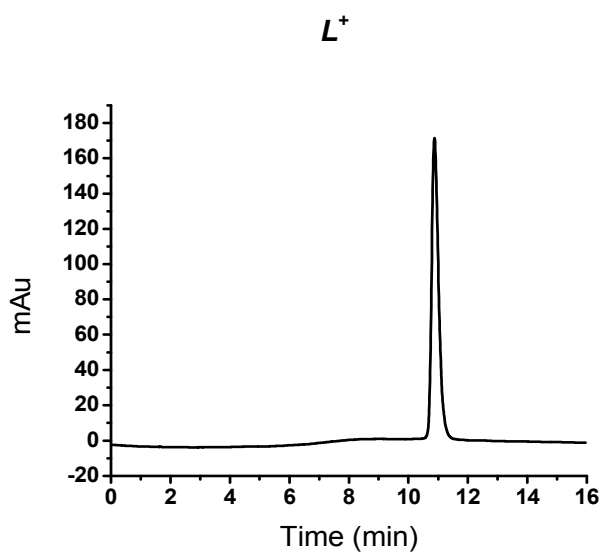

**Figure S1.** Analytical reversed-phase HPLC chromatogram of  $L^+$  acquired with HP1100 chromatograph system (Agilent Technologies). Column: Zorbax 300SB-C18 (4.6 × 250 mm i.d.). Elution profiles were monitored at 280nm. Eluents: solvent A: 0.1% trifluoroacetic acid (TFA) in water, pH 2.0; solvent B: 0.1% TFA in methanol, pH 2.0. Chromatograph run conditions for all the peptides: flow rate: 1ml/min; gradient: 2% B/min; temperature: ambient.

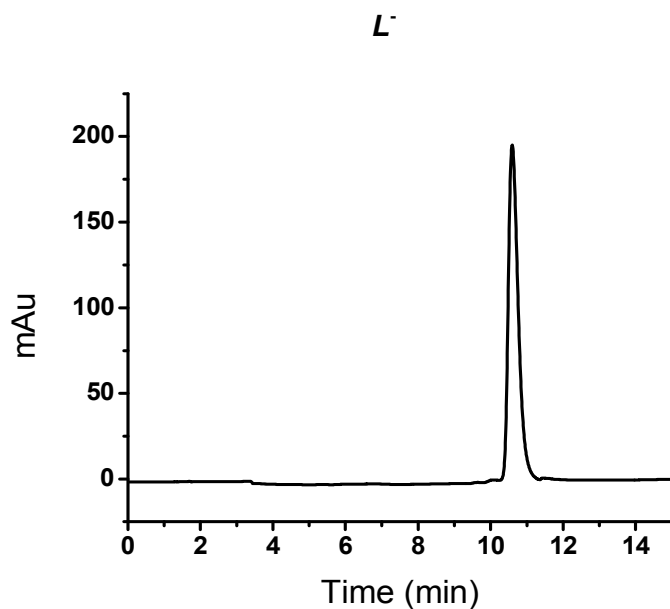

**Figure S2.** Analytical reversed-phase HPLC chromatogram of  $L^+$  acquired with HP1100 chromatograph system (Agilent Technologies). Column: Zorbax 300SB-C18 (4.6 × 250 mm i.d.). Elution profiles were monitored at 280nm. Eluents: solvent A: 20 mM  $\text{NH}_4\text{HCO}_3$  in water, pH 7.0; solvent B: 20 mM  $\text{NH}_4\text{HCO}_3$  in water (40%) + methanol (60%) mixture, pH 7.0. Chromatograph run conditions for all the peptides: flow rate: 1ml/min; gradient: 2% B/min; temperature: ambient.

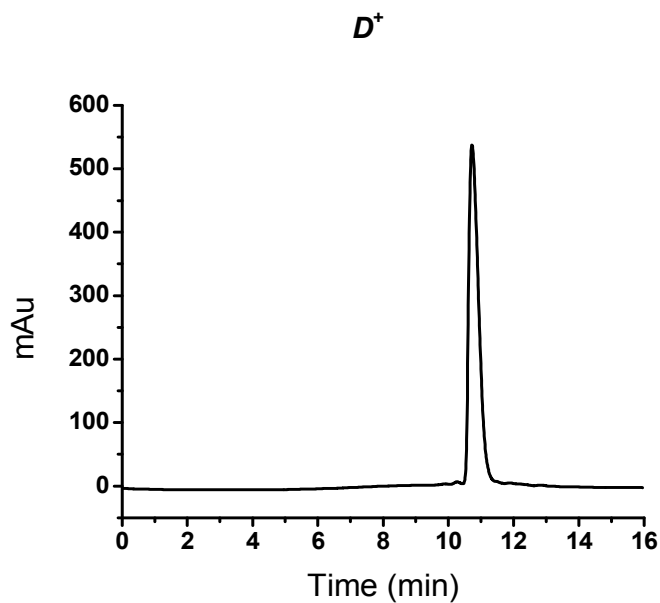

**Figure S3.** Analytical reversed-phase HPLC chromatogram of *D*<sup>+</sup> acquired with HP1100 chromatograph system (Agilent Technologies). Column: Zorbax 300SB-C18 (4.6 × 250 mm i.d.). Elution profiles were monitored at 280nm. Eluents: solvent A: 0.1% trifluoroacetic acid (TFA) in water, pH 2.0; solvent B: 0.1% TFA in methanol, pH 2.0. Chromatograph run conditions for all the peptides: flow rate: 1ml/min; gradient: 2% B/min; temperature: ambient.

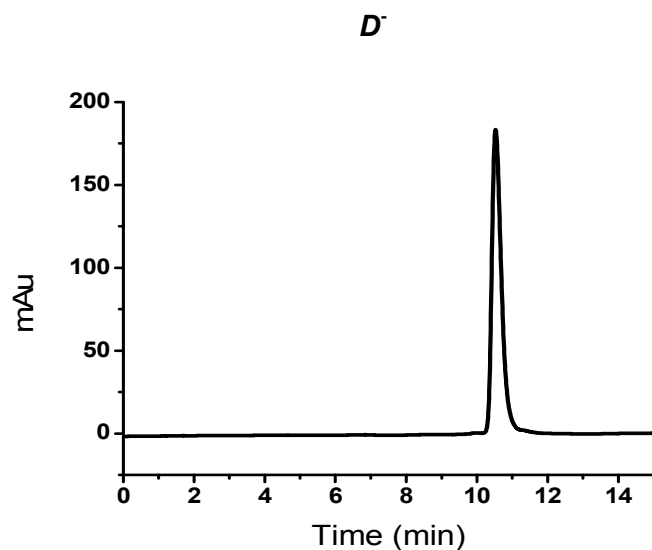

**Figure S4.** Analytical reversed-phase HPLC chromatogram of ***D*** acquired with HP1100 chromatograph system (Agilent Technologies). Column: Zorbax 300SB-C18 (4.6 × 250 mm i.d.). Elution profiles were monitored at 280nm. Eluents: solvent A: 20 mM NH<sub>4</sub>HCO<sub>3</sub> in water, pH 7.0; solvent B: 20 mM NH<sub>4</sub>HCO<sub>3</sub> in water (40%) + methanol (60%) mixture, pH 7.0. Chromatograph run conditions for all the peptides: flow rate: 1ml/min; gradient: 2% B/min; temperature: ambient.

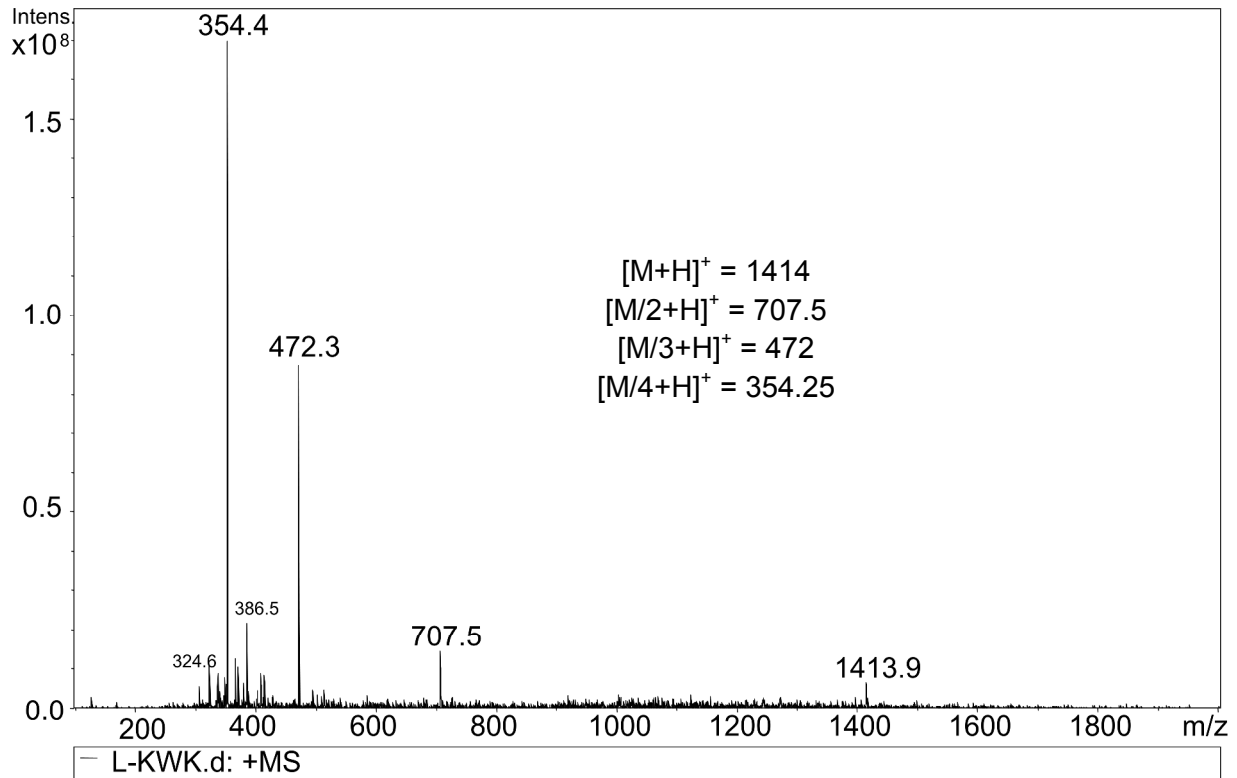

**Figure S5.**  $L^+$  Mass spectrum acquired with an Amazon X Ion Trap Mass Spectrometer (Bruker) in positive ion mode. Flow rate of 3  $\mu$ L/min, 10 psi nebulizer pressure, 4 L/min dry gas flow and 250°C gas temperature.

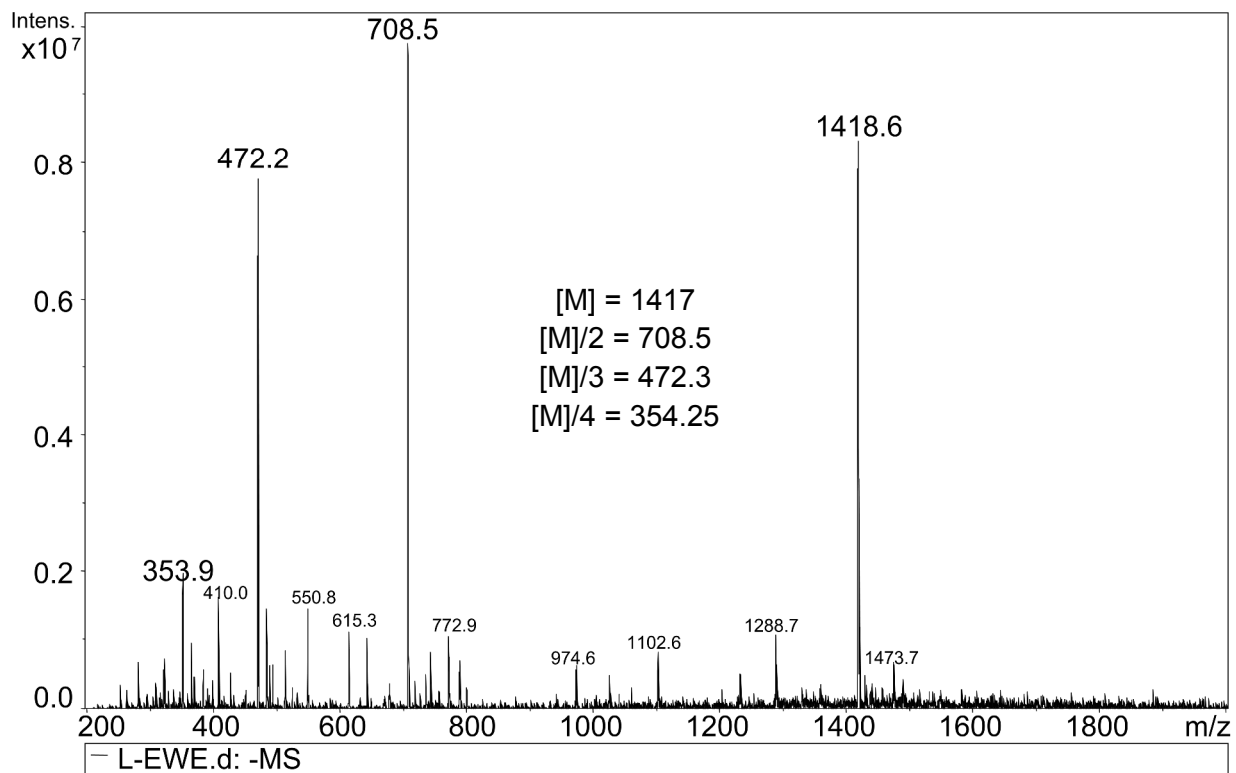

**Figure S6.**  $L^-$  mass spectrum acquired with an Amazon X Ion Trap Mass Spectrometer (Bruker) in negative ion mode. Flow rate of 3  $\mu\text{L}/\text{min}$ , 10 psi nebulizer pressure, 4 L/min dry gas flow and 250°C gas temperature.

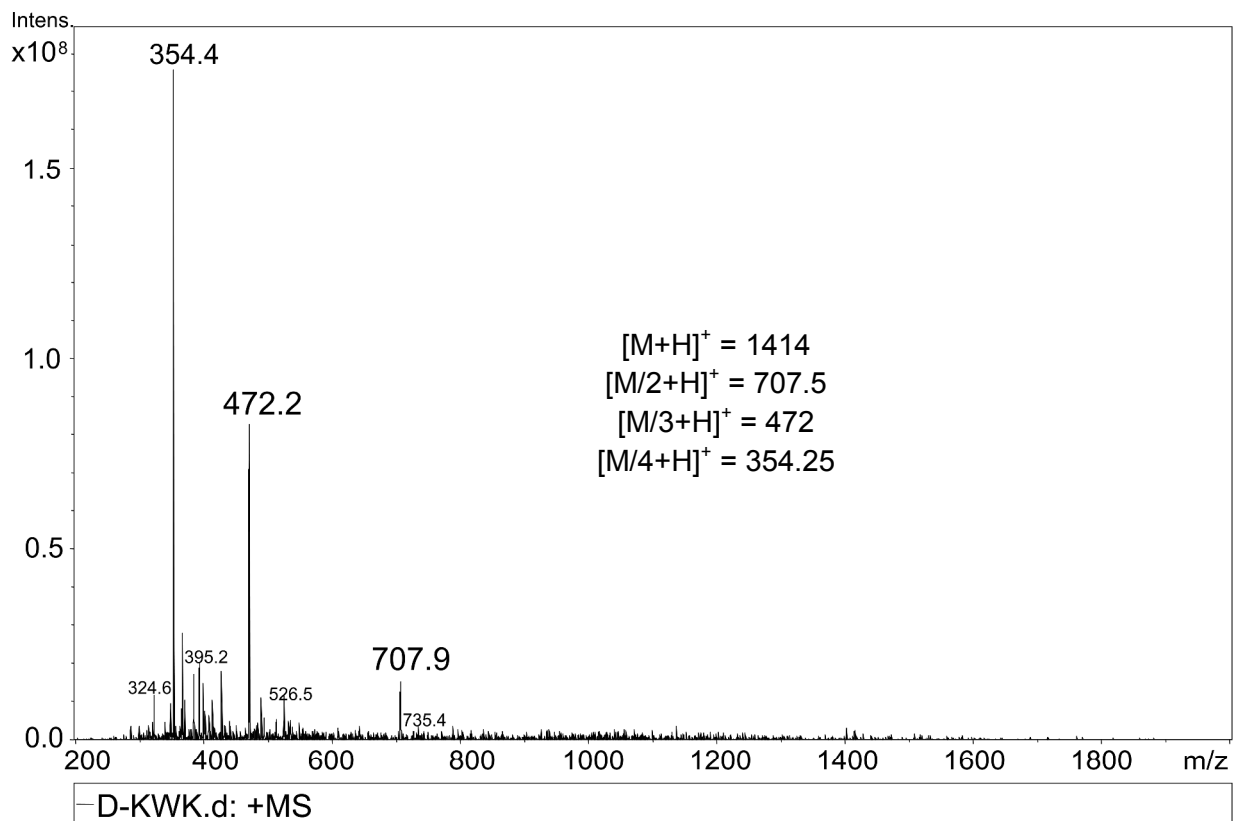

**Figure S7.**  $D^+$  mass spectrum acquired with an Amazon X Ion Trap Mass Spectrometer (Bruker) in positive ion mode. Flow rate of 3  $\mu$ L/min, 10 psi nebulizer pressure, 4 L/min dry gas flow and 250°C gas temperature.



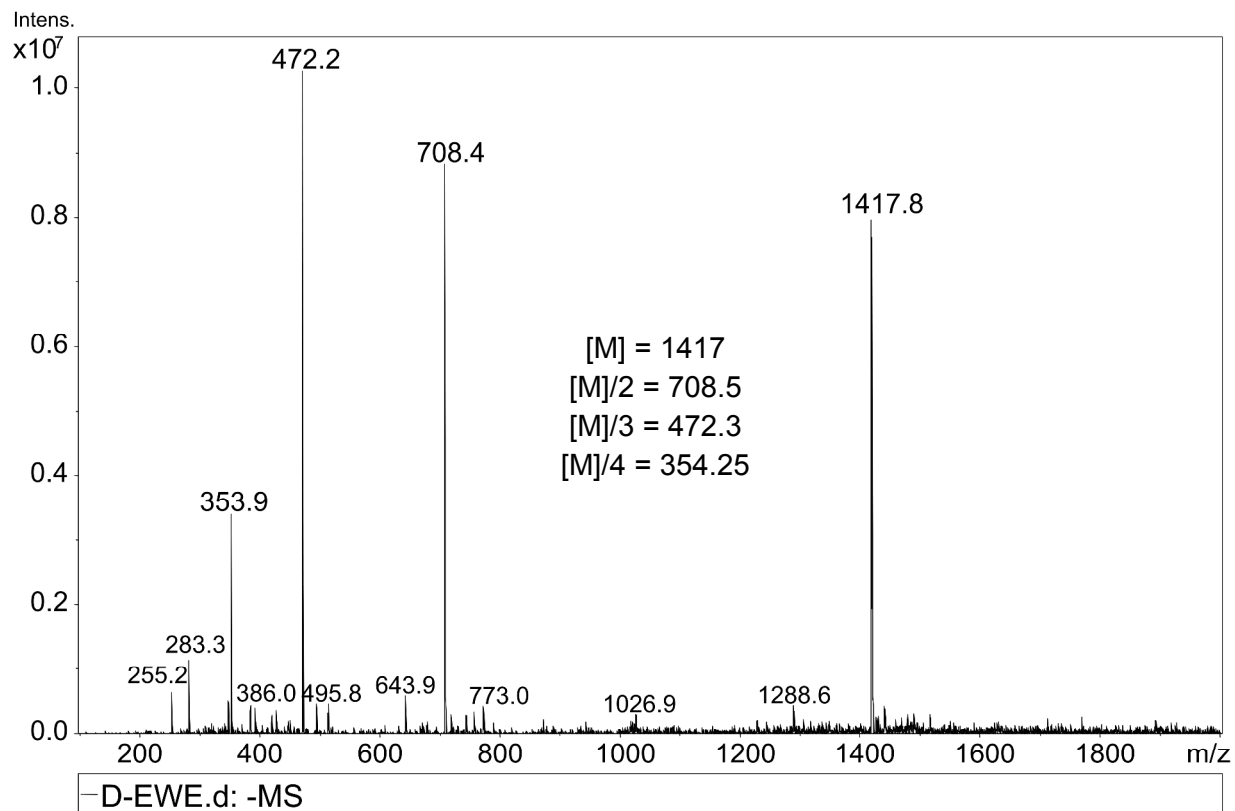

**Figure S8.** *D*<sup>-</sup> mass spectrum acquired with an Amazon X Ion Trap Mass Spectrometer (Bruker) in negative ion mode. Flow rate of 3  $\mu$ L/min, 10 psi nebulizer pressure, 4 L/min dry gas flow and 250°C gas temperature.

**Table S1.** Results from a series of paired t-tests to determine significant differences in cell behavior on different hydrogel types. Table (A) shows **viability** and table (B) shows cell number. For acceptance,  $p < 0.01$ .

A. **Viability** (n = 54)

| Hypothesis             | p value | Result   |
|------------------------|---------|----------|
| <b>Single Peptides</b> |         |          |
| $L^- > L^+$            | 0.2     | rejected |
| $L^+ > D^+$            | 0.5     | rejected |
| $L^- > D^-$            | 0.4     | rejected |
| $D^- > D^+$            | 0.1     | rejected |
| $D^- > L^+$            | 0.2     | rejected |
| $L^- > D^+$            | 0.2     | rejected |
| <b>Neutral Gels</b>    |         |          |
| $(LL)^0 > (LD)^0$      | 2.0E-06 | accepted |
| $(LL)^0 > (DL)^0$      | 1.0E-05 | accepted |
| $(DL)^0 > (LD)^0$      | 0.5     | rejected |
| $(LD)^0 > (DD)^0$      | 0.1     | rejected |
| $(DL)^0 > (DD)^0$      | 0.06    | rejected |
| $(LL)^0 > (DD)^0$      | 1.0E-07 | accepted |
| $(DD)^0 > (LLDD)^0$    | 4.0E-06 | accepted |
| $(LD)^0 > (LLDD)^0$    | 1.0E-06 | accepted |
| $(DL)^0 > (LLDD)^0$    | 8.0E-07 | accepted |
| <b>Charged Gels</b>    |         |          |
| $(DD)^0 > (DD)^+$      | 0.003   | accepted |
| $(DD)^- > (DD)^0$      | 0.009   | accepted |
| $(LL)^+ > (DD)^+$      | 5.0E-07 | accepted |
| $(LL)^- > (DD)^-$      | 0.003   | accepted |
| $(LL)^0 > (LL)^+$      | 0.1     | rejected |
| $(LL)^0 > (LL)^-$      | 0.08    | rejected |
| $(LL)^- > (LL)^+$      | 0.4     | rejected |

B. Cell Number (n = 9)

| Hypothesis             | Day | p value | Result   |
|------------------------|-----|---------|----------|
| <b>Single Peptides</b> |     |         |          |
| $L^- > L^+$            | 1   | 0.2     | rejected |
| $L^+ > D^+$            | 1   | 0.1     | rejected |
| $L^- > D^-$            | 1   | 0.1     | rejected |
| $D^- > D^+$            | 1   | 0.06    | rejected |
| $D^- > L^+$            | 1   | 0.2     | rejected |
| $L^- > D^+$            | 1   | 0.02    | rejected |
| $L^- > L^+$            | 3   | 0.2     | rejected |
| $L^+ > D^+$            | 3   | 0.5     | rejected |
| $L^- > D^-$            | 3   | 0.5     | rejected |
| $D^- > D^+$            | 3   | 0.3     | rejected |
| $D^- > L^+$            | 3   | 0.3     | rejected |
| $L^- > D^+$            | 3   | 0.2     | rejected |
| $L^- > L^+$            | 7   | 0.4     | rejected |
| $L^+ > D^+$            | 7   | 0.4     | rejected |
| $L^- > D^-$            | 7   | 0.4     | rejected |
| $D^- > D^+$            | 7   | 0.4     | rejected |
| $D^- > L^+$            | 7   | 0.5     | rejected |
| $L^- > D^+$            | 7   | 0.2     | rejected |
| <b>Neutral Gels</b>    |     |         |          |
| $(LL)^0 > (LD)^0$      | 1   | 0.3     | rejected |
| $(LL)^0 > (DL)^0$      | 1   | 0.3     | rejected |
| $(DL)^0 > (LD)^0$      | 1   | 0.3     | rejected |
| $(LD)^0 > (DD)^0$      | 1   | 3.0E-05 | accepted |
| $(DL)^0 > (DD)^0$      | 1   | 3.0E-05 | accepted |
| $(LL)^0 > (DD)^0$      | 1   | 7.0E-04 | accepted |
| $(LL)^0 > (LLDD)^0$    | 1   | 0.004   | accepted |
| $(LD)^0 > (LLDD)^0$    | 1   | 7.0E-04 | accepted |
| $(DL)^0 > (LLDD)^0$    | 1   | 0.002   | accepted |
| $(LLDD)^0 > (DD)^0$    | 1   | 0.2     | rejected |
| $(LL)^0 > (LD)^0$      | 3   | 0.2     | rejected |
| $(LL)^0 > (DL)^0$      | 3   | 0.2     | rejected |
| $(DL)^0 > (LD)^0$      | 3   | 0.3     | rejected |
| $(LD)^0 > (DD)^0$      | 3   | 0.4     | rejected |
| $(DL)^0 > (DD)^0$      | 3   | 0.3     | rejected |

|                     |   |         |          |
|---------------------|---|---------|----------|
| $(LL)^0 > (DD)^0$   | 3 | 0.03    | rejected |
| $(LL)^0 > (LLDD)^0$ | 3 | 2.0E-04 | accepted |
| $(LD)^0 > (LLDD)^0$ | 3 | 4.0E-04 | accepted |
| $(DL)^0 > (LLDD)^0$ | 3 | 0.002   | accepted |
| $(DD)^0 > (LLDD)^0$ | 3 | 0.012   | rejected |
| $(LL)^0 > (LD)^0$   | 7 | 0.003   | accepted |
| $(LL)^0 > (DL)^0$   | 7 | 6.0E-04 | accepted |
| $(DL)^0 > (LD)^0$   | 7 | 0.3     | rejected |
| $(DD)^0 > (LD)^0$   | 7 | 0.1     | rejected |
| $(DD)^0 > (DL)^0$   | 7 | 0.09    | rejected |
| $(LL)^0 > (DD)^0$   | 7 | 0.2     | rejected |
| $(LD)^0 > (LLDD)^0$ | 7 | 3.0E-05 | accepted |
| $(DL)^0 > (LLDD)^0$ | 7 | 3.0E-05 | accepted |
| $(DD)^0 > (LLDD)^0$ | 7 | 5.0E-05 | accepted |
| <b>Charged Gels</b> |   |         |          |
| $(DD)^0 > (DD)^+$   | 1 | 0.004   | accepted |
| $(DD)^- > (DD)^0$   | 1 | 5.0E-04 | accepted |
| $(DD)^- > (DD)^+$   | 1 | 0.002   | accepted |
| $(LL)^+ > (DD)^+$   | 1 | 5.0E-06 | accepted |
| $(LL)^- > (DD)^-$   | 1 | 0.0004  | accepted |
| $(LL)^0 > (LL)^+$   | 1 | 0.014   | rejected |
| $(LL)^- > (LL)^0$   | 1 | 0.09    | rejected |
| $(LL)^- > (LL)^+$   | 1 | 0.03    | rejected |
| $(DD)^0 > (DD)^+$   | 3 | 0.014   | rejected |
| $(DD)^- > (DD)^0$   | 3 | 0.1     | rejected |
| $(DD)^- > (DD)^+$   | 3 | 0.004   | accepted |
| $(LL)^+ > (DD)^+$   | 3 | 0.005   | accepted |
| $(LL)^- > (DD)^-$   | 3 | 0.09    | rejected |
| $(LL)^0 > (LL)^+$   | 3 | 0.4     | rejected |
| $(LL)^- > (LL)^0$   | 3 | 0.4     | rejected |
| $(LL)^- > (LL)^+$   | 3 | 0.5     | rejected |
| $(DD)^0 > (DD)^+$   | 7 | 0.1     | rejected |
| $(DD)^- > (DD)^0$   | 7 | 0.2     | rejected |
| $(DD)^- > (DD)^+$   | 7 | 0.002   | accepted |
| $(LL)^+ > (DD)^+$   | 7 | 0.006   | accepted |
| $(LL)^- > (DD)^-$   | 7 | 0.5     | rejected |
| $(LL)^0 > (LL)^+$   | 7 | 0.2     | rejected |

|                   |   |     |          |
|-------------------|---|-----|----------|
| $(LL)^- > (LL)^0$ | 7 | 0.5 | rejected |
| $(LL)^- > (LL)^+$ | 7 | 0.3 | rejected |

### WST-1 subtraction procedure

Cell+Gel Average Absorbance = Avg. Abs.(cells on gel, day X) – Avg. Abs.(gel, day X)

TCPS Average Absorbance = Avg. Abs.(cells on plate, day X) – Avg. Abs.(plate, day X)

Absorbances were normalized by Avg. TCPS, day 7, i.e.,

$$\text{Cell+Gel Average Absorbance/TCPS Average Absorbance (day 7)} \times 100\%$$
